# Supplementary material for: Prevalence and Risk Factors of Eimeria spp. in Broiler Chickens from Pichincha and Santo Domingo de los Tsáchilas, Ecuador
Source: Pathogens. 2024 Jan 4;13(1):48. doi: 10.3390/pathogens13010048 (PMC10820216; doi:10.3390/pathogens13010048)
Supplement: Supplementary file 1 [file pathogens-13-00048-s001.zip › Table S1.pdf]

**Table S1.** General information and farm management

| PARAMETER                     | CATEGORY                       | PARAMETER                                 | CATEGORY              |
|-------------------------------|--------------------------------|-------------------------------------------|-----------------------|
| DEPENDENCE                    | Integrated                     | BED COMPOSTING METHOD                     | Fermentation          |
|                               | Independent                    |                                           | None                  |
|                               | Company 3                      | PRESENCE OF <i>Alphitubius diaperinus</i> | Yes                   |
|                               | Company 1                      |                                           | No                    |
| COMPANY                       | Company 2                      | RAT CONTROL                               | Yes                   |
|                               | Company 4                      |                                           | No                    |
|                               | Company 5                      | INSECT CONTRO                             | Yes                   |
|                               | Others                         |                                           | No                    |
| FARM CAPACITY                 | Less than 26.000 birds         | <i>Alphitubius diaperinus</i> CONTROL     | Yes                   |
|                               | 28.000 - 87.000 birds          |                                           | No                    |
|                               | More than 88.000 birds         | ANTICOCCIDIAL CONTROL METHOD              | Vaccination           |
| OTHER AGRICULTURAL ACTIVITIES | Yes                            |                                           | Anticoccidial in feed |
|                               | No                             |                                           | None                  |
| ALTITUDE                      | Below 1300mamsl                | VACCINATION AGE                           | Eclotion              |
|                               | Above 1300mamsl                |                                           | First week            |
|                               | Intermedium                    | VACCINE TYPE                              | Live vaccine          |
| DENSITY (KG/M2)               | Below                          |                                           | Attenuated vaccine    |
|                               | High                           | VACCINATION CYCLES ON FARM                | Less than 3 lots      |
|                               | Between 9.6 - 11               |                                           | More than 4 lots      |
| DENSITY (BIRDS/M2)            | Below than 9.5                 | LAST ACTIVE ANTICOCCIDIAL DRUG            |                       |
|                               | More than 11.1                 |                                           | Chemical – Ionophore  |
| SHED TYPE                     | Controlled environment         | USED PROGRAM                              | Chemical              |
|                               | Open air shed                  |                                           | Ionophore             |
|                               | Galvalume                      |                                           | Ionophore – Chemical  |
| ROOF MATERIAL                 | Asbestos                       | ROTATION TIME                             | Less than 6 months    |
|                               | Zinc                           |                                           | More than 7 months    |
| FLOOR MATERIAL                | Cement                         | EFFECTIVE WITHDRAWAL TIME                 | Less than 5 days      |
|                               | Soil                           |                                           | More than 6 days      |
| ROOF SUPPORT MATERIAL         | Metal                          | CLINICAL COCCIDIOSIS                      | Yes                   |
|                               | Wood                           |                                           | No                    |
| ADDITIONAL ILLUMINATION       | No                             | WATER ANTICOCCIDIALS                      | Yes                   |
|                               | Yes                            |                                           | No                    |
| TYPE OF LIGHTING              | Yellow                         | ACTIVE INGREDIENT ADMINISTRATION AGE      |                       |
|                               | White                          | TIME (days)                               |                       |
| TYPE OF VENTILATION           | Mechanic                       | GENETIC                                   | COBB                  |
|                               | Natural                        |                                           | ROSS                  |
| TYPE OF DRINKERS              | Closed Systems                 |                                           | More than 46 days     |
|                               | Open Systems                   | BIRG AGE                                  | Less than 35 days     |
| ORIGIN OF WATER               | River or canal                 |                                           | Between 36 to 45 days |
|                               | Well                           |                                           | Male                  |
|                               | Drinking water                 | SEX                                       | Female                |
|                               | Chlorine                       |                                           | Mixt                  |
| SANITIZERS USED IN WATER      | Chlorine and Hydrogen peroxide | WEIGHT                                    | Less than 2.5kg       |
|                               | Hydrogen peroxide              |                                           | More than 2.6kg       |
|                               | Three or more                  | FEED TYPE                                 | Free (Ad libitum)     |
| HYDROGEN PEROXIDE             | Yes                            |                                           | Controlled            |
|                               | No                             | REPOPULATION TIME                         | More than 68 days     |
| CHLORINE                      | Yes                            |                                           | Less than 60 days     |
|                               | No                             |                                           | Between 61 to 67 days |
| TYPE OF FEEDERS               | Mechanical                     |                                           | More than 18 days     |
|                               | Manual                         | SANITARY EMPTYING                         | Between 8 to 15 days  |
| FEED PRESENTATION             | Flour                          |                                           | Between 3 to 7 days   |
|                               | Pellet                         | LIME                                      | No                    |
| ORIGIN OF FEED                | Manufacture                    |                                           | Yes                   |
|                               | Purchase                       | PHENOLIC                                  | No                    |
|                               | Rice husk                      |                                           | Yes                   |
| BEDDING MATERIAL              | Wood shavings                  | FORMALDEHYDE                              | No                    |
|                               | Others                         |                                           | Yes                   |
| BEDDING HUMIDITY              | Less than 25%                  | FLAMING                                   | No                    |
|                               | More than 26%                  |                                           | Yes                   |
|                               | Two o three uses               | QUATERNART AMMONIUM                       | No                    |
| NUMBER OF BED USES            | One use                        |                                           | Yes                   |
|                               | More than 4 uses               | OTHER DISINFECTANS                        | No                    |
|                               | Between 10 to 15cm             |                                           | Yes                   |
| BED DEPTH                     | Less than 10cm                 |                                           |                       |
|                               | More than 15cm                 |                                           |                       |
