# Supplementary material for: Prevalence and Risk Factors of Eimeria spp. in Broiler Chickens from Pichincha and Santo Domingo de los Tsáchilas, Ecuador
Source: Pathogens. 2024 Jan 4;13(1):48. doi: 10.3390/pathogens13010048 (PMC10820216; doi:10.3390/pathogens13010048)
Supplement: Supplementary file 1 [file pathogens-13-00048-s001.zip › Table S2.pdf]

**Table S2.** Relationship between oocyst per gram of feces (OPG) and *Eimeria* spp. species found with the characteristics and control measures applied in the studied farms.

|                                 | OPG     |                            |             | <i>E. acervulina</i> |                           |             | <i>E. brunetti</i> |                         |             | <i>E. maxima</i> |                      |           | <i>E. necatrix</i> |                         |             | <i>E. praecox</i> |                      |              | <i>E. tenella</i> |                          |              |
|---------------------------------|---------|----------------------------|-------------|----------------------|---------------------------|-------------|--------------------|-------------------------|-------------|------------------|----------------------|-----------|--------------------|-------------------------|-------------|-------------------|----------------------|--------------|-------------------|--------------------------|--------------|
| Parameter                       | %       | OPG<br>medi<br>a           | P           | %                    | OR<br>(95%CI)             | P           | %                  | OR<br>(95%CI)           | P           | %                | OR<br>(95%CI)        | P         | %                  | OR<br>(95%CI)           | P           | %                 | OR<br>(95%CI)        | P            | %                 | OR<br>(95%IC)            | P            |
| DEPENDENCE                      |         |                            |             |                      |                           |             |                    |                         |             |                  |                      |           |                    |                         |             |                   |                      |              |                   |                          |              |
| Integrated                      | 58<br>% | 5460                       | 0.19        | 65.<br>52            | Reference                 |             | 21<br>.5           | Reference               |             | 7<br>7           | Reference            |           | 45<br>.2           | Reference               |             | 46<br>.2          | Reference            |              | 42<br>.5          | Reference                |              |
| Independent                     | 42<br>% | 9052                       |             | 77.<br>27            | 2.13 (1.00-<br>4.72)      | 0.03<br>9*  | 43<br>.9           | 2.84<br>(1.35-<br>6.08) | 0.00<br>3** | 8<br>5           | 2.16 (0.91-<br>5.48) | 0.08<br>3 | 63<br>.6           | 2.21<br>(1.11-<br>4.47) | 0.01<br>6 * | 68<br>.2          | 2.48 (1.23-<br>5.10) | 0.00<br>9 ** | 68<br>.2          | 3.22<br>(1.59-<br>6.67)  | 0.00<br>1 ** |
| FARM SIZE                       |         |                            |             |                      |                           |             |                    |                         |             |                  |                      |           |                    |                         |             |                   |                      |              |                   |                          |              |
| Large                           | 31<br>% | 4988.<br>3                 | 0.38        | 65.<br>12            | Reference                 |             | 26<br>.5           | Reference               |             | 8<br>1           | Reference            |           | 55<br>.1           | Reference               |             | 53<br>.1          | Reference            |              | 53<br>.5          | Reference                |              |
| Medium                          | 35<br>% | 6804.<br>6                 |             | 71.<br>43            | 7.86 (0.77-<br>4.57)      | 0.15        | 25                 | 0.92<br>(0.35-<br>2.44) | 1           | 7<br>9           | 1.46 (0.55-<br>3.95) | 0.25<br>2 | 50                 | 0.82<br>(0.35-<br>1.88) | 0.7         | 57<br>.1          | 1.18 (0.51-<br>2.73) | 0.69<br>8    | 42<br>.9          | 0.85<br>(0.37-<br>1.97)  | 0.69<br>8    |
| Small                           | 34<br>% | 8883.<br>8                 |             | 74.<br>07            | 2.13 (0.86-<br>5.37)      | 0.96        | 40<br>.7           | 1.89<br>(0.77-<br>4.82) | 0.15        | 8<br>1           | 1.75 (0.63-<br>4.99) | 0.49<br>8 | 51<br>.9           | 0.88<br>(0.38-<br>2.05) | 0.87        | 55<br>.6          | 1.11 (0.47-<br>2.58) | 0.84<br>5    | 64<br>.8          | 2.07<br>(0.88-<br>4.96)  | 0.07<br>7    |
| ALTITUDE                        |         |                            |             |                      |                           |             |                    |                         |             |                  |                      |           |                    |                         |             |                   |                      |              |                   |                          |              |
| Below<br>1300MAMSL              | 77<br>% | 8338.<br>1                 | 0.00<br>0** | 64.<br>86            | Reference                 |             | 18<br>.9           | Reference               |             | 7<br>6           | Reference            |           | 54<br>.1           | Reference               |             | 51<br>.4          | Reference            |              | 37<br>.8          | Reference                |              |
| Above<br>1300MAMSL              | 23<br>% | 2582.<br>4                 |             | 72.<br>41            | 1.32 (0.56-<br>3.02)      | 0.55        | 34<br>.4           | 2.35<br>(0.91-<br>6.85) | 0.07        | 8<br>2           | 1.30 (0.50-<br>3.22) | 0.51<br>5 | 51<br>.6           | 0.98<br>(0.44-<br>2.16) | 1           | 56<br>.6          | 1.33 (0.60-<br>2.94) | 0.46<br>1    | 58<br>.6          | 0.486<br>(0.21-<br>1.09) | 0.06<br>2    |
| DENSITY (Kg/m <sup>2</sup> )    |         |                            |             |                      |                           |             |                    |                         |             |                  |                      |           |                    |                         |             |                   |                      |              |                   |                          |              |
| Intermediate                    | 29<br>% | 12113<br>.61 <sup>ab</sup> | 0.01<br>1*  | 72.<br>92            | Reference                 |             | 37                 | Reference               |             | 9<br>2           | Reference            |           | 53<br>.7           | Reference               |             |                   | Reference            |              | 60<br>.4          | Reference                |              |
| Low                             | 33<br>% | 14289<br>.6 <sup>a</sup>   |             | 84.<br>31            | 2.44 (0.94-<br>6.65)      | 0.05        | 33<br>.3           | 0.83<br>(0.34-<br>1.97) | 0.2         | 8<br>6           | 1.22 (0.41-<br>3.69) | 0.81      | 56<br>.9           | 1.08<br>(0.47-<br>2.47) | 0.85        | 62<br>.8          | 1.27 (0.55-<br>2.93) | 0.56<br>5    | 60<br>.8          | 0.68<br>(0.29-<br>1.57)  | 0.56<br>7    |
| High                            | 38<br>% | 9579.<br>94 <sup>b</sup>   |             | 55.<br>56            | 0.82 (0.35-<br>1.92)      | 0.69        | 22<br>.2           | 0.54<br>(0.21-<br>1.36) | 0.69        | 6<br>5           | 0.55 (0.20-<br>1.45) | 0.19      | 46<br>.3           | 0.86<br>(0.38-<br>1.98) | 0.85        | 48<br>.2          | 0.87 (0.38-<br>1.99) | 0.84<br>6    | 40<br>.7          | 1.26<br>(0.55-2.9)       | 0.33<br>9    |
| DENSITY (Birds/m <sup>2</sup> ) |         |                            |             |                      |                           |             |                    |                         |             |                  |                      |           |                    |                         |             |                   |                      |              |                   |                          |              |
| Between 9.6<br>and 11           | 34<br>% | 6128.<br>24 <sup>ab</sup>  | 0.02<br>5*  | 65.<br>12            | Reference                 |             | 32<br>.7           | Reference               |             | 8<br>2           | Reference            | 0.64      | 49                 | Reference               |             | 44<br>.9          | Reference            |              | 60<br>.5          | Reference                |              |
| Below 9.5                       | 32<br>% | 10049<br>.12 <sup>a</sup>  |             | 80                   | 2.97 (1.18-<br>7.72)      | 0.01<br>2** | 33<br>.3           | 1.03<br>(0.43-<br>2.50) | 1           | 8<br>8           | 1.29 (0.45-3.67)     |           | 53<br>.3           | 1.19<br>(0.52-<br>2.71) | 0.7         | 65                | 2.26 (0.98-<br>5.31) | 0.05<br>2    | 56<br>.7          | 1.16<br>(0.51-<br>2.64)  | 0.84<br>7    |
| Above 11.1                      | 34<br>% | 4847.<br>69 <sup>b</sup>   |             | 64                   | 1.33<br>(0.550-<br>3.239) | 0.54        | 26                 | 0.73<br>(0.28-<br>1.89) | 0.51        | 7<br>2           | 0.75 (0.26-<br>2.04) | 0.64<br>5 | 54                 | 1.22<br>(0.52-<br>2.90) | 0.69        | 54                | 1.44 (0.61-<br>3.43) | 0.42<br>4    | 44<br>.4          | 0.68<br>(0.29-<br>1.57)  | 0.42<br>4    |
| TYPE OF POULTRY HOUSE           |         |                            |             |                      |                           |             |                    |                         |             |                  |                      |           |                    |                         |             |                   |                      |              |                   |                          |              |
| Controlled<br>environment       | 17<br>% | 7812                       | 0.63        | 66.<br>67            | Reference                 |             | 22<br>.2           | Reference               |             | 6<br>7           | Reference            |           | 51<br>.9           | Reference               |             | 59<br>.3          | Reference            |              | 40<br>.7          | Reference                |              |
| Open                            | 83<br>% | 6774.<br>9                 |             | 71.<br>43            | 1.07 (0.39-<br>2.77)      | 1           | 32<br>.6           | 1.69<br>(0.60-<br>5.48) | 1           | 8<br>3           | 1.94 (0.69-<br>5.17) | 0.21      | 52<br>.3           | 1.02<br>(0.41-<br>2.53) | 1           | 54<br>.6          | 0.83 (0.32-<br>2.06) | 1            | 56<br>.4          | 1.69<br>(0.67-<br>4.35)  | 0.39<br>1    |
| ROOF MATERIAL                   |         |                            |             |                      |                           |             |                    |                         |             |                  |                      |           |                    |                         |             |                   |                      |              |                   |                          |              |
| Galvalume                       | 84<br>% | 7225.<br>6                 | 0.2         | 71.<br>88            | Reference                 |             | 30<br>.6           | Reference               |             | 8<br>3           | Reference            |           | 53<br>.7           | Reference               |             | 54<br>.5          | Reference            |              | 55<br>.5          | Reference                |              |
| Asbestos                        | 9<br>%  | 4494.<br>6                 |             | 57.<br>14            | 0.61 (0.17-<br>2.28)      | 0.38        | 28<br>.6           | 0.91<br>(0.20-<br>3.38) | 1           | 6<br>4           | 0.48 (0.13-<br>1.97) | 0.31      | 50                 | 0.86<br>(0.24-<br>3.05) | 1           | 57<br>.1          | 1.11 (0.32-<br>4.12) | 1            | 42<br>.9          | 0.67<br>(0.18-<br>2.33)  | 0.57<br>8    |
| Zinc                            | 7<br>%  | 6731.<br>8                 |             | 72.<br>73            | 1.22(0.27-<br>7.47)       | 1           | 36<br>.4           | 1.29<br>(0.26-<br>5.42) | 0.74        | 7<br>3           | 0.71 (0.16-<br>4.40) | 0.7       | 36<br>.4           | 0.49<br>(0.10-<br>2.05) | 0.35        | 63<br>.6          | 1.46 (0.35-<br>7.12) | 0.75<br>5    | 45<br>.5          | 0.74<br>(0.17-<br>3.07)  | 0.75<br>7    |

|                         |     |                       |             |       |                   |             |      |                   |      |    |                   |             |      |                  |      |      |                    |              |      |                   |       |
|-------------------------|-----|-----------------------|-------------|-------|-------------------|-------------|------|-------------------|------|----|-------------------|-------------|------|------------------|------|------|--------------------|--------------|------|-------------------|-------|
| FLOOR MATERIAL          |     |                       |             |       |                   |             |      |                   |      |    |                   |             |      |                  |      |      |                    |              |      |                   |       |
| Cement                  | 49% | 2614.1                | 0.00<br>0** | 56.94 | Reference         |             | 26.9 | Reference         |      | 78 | Reference         |             | 46.2 | Reference        |      | 44.9 | Reference          |              | 51.4 | Reference         |       |
| Soil                    | 51% | 11127                 |             | 82.71 | 4.28 (1.98-9.67)  | 0.00<br>0** | 34.6 | 1.43 (0.69-3.00)  | 0.31 | 83 | 1.87 (0.83-4.36)  | 0.13        | 58   | 1.61 (0.82-3.17) | 0.15 | 65.4 | 2.31 (1.17-4.64)   | 0.01<br>1 ** | 55.6 | 1.38 (0.71-2.71)  | 0.343 |
| ROOF SOPPORT MATERIAL   |     |                       |             |       |                   |             |      |                   |      |    |                   |             |      |                  |      |      |                    |              |      |                   |       |
| Metal                   | 39% | 5701.6                | 0.28        | 57.63 | Reference         |             | 25.8 | Reference         |      | 75 | Reference         |             | 50   | Reference        |      | 41.9 | Reference          |              | 54.2 | Reference         |       |
| Wood                    | 61% | 7749.5                |             | 78.72 | 2.63 (1.26-5.56)  | 0.00<br>6** | 34   | 1.48 (0.69-3.24)  | 0.3  | 84 | 1.79 (0.79-4.07)  | 0.17        | 53.6 | 1.15 (0.58-2.30) | 0.75 | 63.9 | 2.44 (1.21-4.97)   | 0.00<br>9 ** | 53.2 | 1 (0.50-1.98)     | 1     |
| ADDITIONAL ILLUMINATION |     |                       |             |       |                   |             |      |                   |      |    |                   |             |      |                  |      |      |                    |              |      |                   |       |
| NO                      | 29% | 5888                  | 0.21        | 72.5  | Reference         |             | 32.6 | Reference         |      | 88 | Reference         |             | 52.2 | Reference        |      | 56.5 | Reference          |              | 67.5 | Reference         |       |
| YES                     | 71% | 7383.7                |             | 69.91 | 1.36 (0.61-2.96)  | 0.46        | 30.1 | 0.89 (0.40-2.01)  | 0.81 | 78 | 1.11 (0.44-2.64)  | 0.34        | 52.2 | 1 (0.48-2.10)    | 1    | 54.9 | 0.56 (0.44-1.97)   | 0.863        | 48.7 | 0.67 (0.31-1.41)  | 0.295 |
| VENTILATION TYPE        |     |                       |             |       |                   |             |      |                   |      |    |                   |             |      |                  |      |      |                    |              |      |                   |       |
| Mechanical              | 19% | 7250.8                | 0.88        | 71.43 | Reference         |             | 26.7 | Reference         |      | 75 | Reference         |             | 53.3 | Reference        |      | 56.7 | 0.94 (0.38-2.27)   |              | 46.4 | Reference         |       |
| Natural                 | 81% | 6881.2                |             | 70.4  | 1.07 (0.41-2.66)  | 1           | 31.8 | 1.28 (0.50-3.61)  | 0.67 | 82 | 1.61 (0.58-4.21)  | 0.33        | 51.9 | 0.95 (0.39-2.26) | 1    | 55   | Reference          | 1            | 55.2 | 1.50 (0.63-3.66)  | 0.418 |
| TYPE OF DRINKERS        |     |                       |             |       |                   |             |      |                   |      |    |                   |             |      |                  |      |      |                    |              |      |                   |       |
| Closed systems          | 48% | 7250                  | 0.47        | 68.06 | Reference         |             | 27.6 | Reference         |      | 76 | Reference         |             | 51.3 | Reference        |      | 54   | Reference          |              | 47.2 | Reference         |       |
| Open systems            | 52% | 6677.2                |             | 72.84 | 1.35 (0.66-2.79)  | 0.4         | 33.7 | 1.33 (0.64-2.79)  | 0.49 | 84 | 1.72 (0.77-3.97)  | 0.19        | 53   | 1.07 (0.55-2.09) | 0.88 | 56.6 | 1.11 (0.57-2.19)   | 0.752        | 59.3 | 1.69 (0.86-3.33)  | 0.114 |
| WATER SOURCE            |     |                       |             |       |                   |             |      |                   |      |    |                   |             |      |                  |      |      |                    |              |      |                   |       |
| River or canal          | 25% | 3506.05 <sup>ab</sup> | 0.04<br>5*  | 51.28 | Reference         |             | 38.5 | Reference         |      | 64 | Reference         |             | 46.2 | Reference        |      | 38.5 | Reference          |              | 53.9 | Reference         |       |
| Well                    | 67% | 8734.63 <sup>a</sup>  |             | 79.21 | 2.79 (1.215-6.46) | 0.00<br>9** | 27.1 | 0.60 (0.26-1.40)  | 0.22 | 87 | 2.57 (1.04-6.33)  | 0.02<br>6 * | 55.1 | 1.43 (0.64-3.21) | 0.36 | 63.6 | 2.77 (1.23-6.41)   | 0.00<br>8 ** | 53.5 | 0.87 (0.39-1.94)  | 0.852 |
| Potable water           | 8%  | 2603.85 <sup>b</sup>  |             | 61.54 | 1.51 (0.36-6.97)  | 0.75        | 38.5 | 1 (0.21-4.27)     | 1    | 77 | 1.85 (0.38-12.17) | 0.51        | 46.2 | 1 (0.23-4.22)    | 1    | 38.5 | 1 (0.21-4.27)      | 1            | 53.9 | 1 (0.24-4.33)     | 1     |
| SANTIZERS USED IN WATER |     |                       |             |       |                   |             |      |                   |      |    |                   |             |      |                  |      |      |                    |              |      |                   |       |
| Chlorine                | 11% | 3126.5                | 0.48        | 64.71 | Reference         |             | 17.7 | Reference         |      | 71 | Reference         |             | 52.9 | Reference        |      | 52.9 | Reference          |              | 35.3 | Reference         | 0.14  |
| Chlorine and peroxide   | 69% | 7679.4                |             | 67.27 | 1.12 (0.31-3.63)  | 1           | 35.5 | 2.55 (0.65-14.66) | 0.18 | 80 | 1.49(0.37-5.12)   | 0.54        | 50.9 | 0.92 (0.29-2.92) | 1    | 54.6 | 1.07 (0.33-3.37)   | 1            | 56.4 | 2.35 (0.73-8.33)  | 0.123 |
| Peroxide                | 2%  | 4050                  |             | 66.67 | 1.09 (0.05-74.91) | 1           | 33.3 | 2.22 (0.03-58.14) | 0.51 | 67 | 0.84 (0.04-58.86) | 1           | 100  | 0.28 (infinite)  | 0.24 | 66.7 | 1.73 (0.08-117.70) | 1            | 33.3 | 0.92 (0.01-21.37) | 1     |
| More than 3 products    | 18% | 6910.2                |             | 91.3  | 1.42 (0.32-6.15)  | 0.74        | 20.7 | 1.21 (0.22-8.70)  | 1    | 91 | 1.58 (0.31-7.76)  | 0.72        | 51.7 | 0.95 (0.24-3.71) | 1    | 58.6 | 1.25 (0.32-4.94)   | 0.765        | 56.5 | 1.48 (0.37-6.29)  | 0.555 |
| PEROXIDE                |     |                       |             |       |                   |             |      |                   |      |    |                   |             |      |                  |      |      |                    |              |      |                   |       |
| YES                     | 71% | 7679.4                | 0.22        | 65.49 | Reference         |             | 34.5 | Reference         | 0.07 | 76 | Reference         |             | 49.6 | Reference        | 0.73 | 53.1 | Reference          | 0.863        | 54.9 | Reference         |       |
| NO                      | 29% | 5315                  |             | 85    | 0.91 (0.41-1.97)  | 0.86        | 21.7 | 2.13 (0.92-5.33)  |      | 93 | 1.16 (0.48-2.72)  | 0.69        | 58.7 | 0.85 (0.41-1.75) |      | 60.9 | 0.90 (0.43-1.87)   |              | 50   | 1.87 (0.90-3.94)  | 0.086 |
| CHROLINE                |     |                       |             |       |                   |             |      |                   |      |    |                   |             |      |                  |      |      |                    |              |      |                   |       |
| YES                     | 80% | 7069.9                | 1           | 66.93 | Reference         | 0.68        | 33.1 | Reference         | 0.29 | 77 | Reference         |             | 51.2 | Reference        | 0.69 | 54.3 | Reference          | 0.693        | 53.5 | Reference         | 0.332 |
| NO                      | 20% | 6478.9                |             | 88.46 | 0.79 (0.29-1.97)  |             | 21.9 | 1.76 (0.67-5.22)  |      | 96 | 0.95 (0.31-2.56)  | 1           | 56.3 | 0.82 (0.34-1.91) |      | 59.4 | 0.82 (0.34-1.91)   |              | 53.9 | 1.48 (0.63-3.51)  |       |
| TYPE OF FEEDERS         |     |                       |             |       |                   |             |      |                   |      |    |                   |             |      |                  |      |      |                    |              |      |                   |       |
| Mechanical              | 55% | 6942.5                | 0.32        | 69.14 | Reference         |             | 24.1 | Reference         |      | 80 | Reference         |             | 54   | Reference        |      | 57.5 | Reference          |              | 46.9 | Reference         |       |

|                                           |         |                       |             |           |                            |             |          |                          |             |        |                       |              |          |                          |              |          |                      |              |          |                          |             |
|-------------------------------------------|---------|-----------------------|-------------|-----------|----------------------------|-------------|----------|--------------------------|-------------|--------|-----------------------|--------------|----------|--------------------------|--------------|----------|----------------------|--------------|----------|--------------------------|-------------|
| Manual                                    | 45<br>% | 6961.<br>2            |             | 72.<br>22 | 1.44 (0.70-<br>3.01)       | 0.31        | 38<br>.9 | 1.99<br>(0.96-<br>4.20)  | 0.06        | 8<br>1 | 1.40 (0.62-<br>3.25)  | 0.45         | 50       | 0.85<br>(0.43-<br>1.67)  | 0.64         | 52<br>.8 | 0.83 (0.42-<br>1.63) | 0.63<br>1    | 61<br>.1 | 2.02<br>(1.02-<br>4.02)  | 0.03<br>8*  |
| FEED PRESENTATION                         |         |                       |             |           |                            |             |          |                          |             |        |                       |              |          |                          |              |          |                      |              |          |                          |             |
| Flour                                     | 25<br>% | 2908.<br>8            |             | 64.<br>71 | Reference                  |             | 32<br>.5 | Reference                |             | 8<br>5 | Reference             |              | 55       | Reference                |              | 50       | Reference            |              | 64<br>.7 | Reference                |             |
| Pelletized                                | 75<br>% | 8309.<br>7            | 0.05        | 72.<br>27 | 2.12 (0.94-<br>4.76)       | 0.05        | 30<br>.3 | 0.90<br>(0.39-<br>2.13)  | 0.84        | 7<br>9 | 1.42 (0.56-<br>3.45)  | 0.39         | 51<br>.3 | 0.86<br>(0.39-<br>1.88)  | 0.72         | 57<br>.1 | 1 (0.61-<br>2.91)    | 0.46<br>6    | 50<br>.4 | 0.83<br>(0.38-<br>1.81)  | 0.71<br>5   |
| FEED ORIGIN                               |         |                       |             |           |                            |             |          |                          |             |        |                       |              |          |                          |              |          |                      |              |          |                          |             |
| Manufactured                              | 76<br>% | 4939.<br>5            |             | 62.<br>61 | Reference                  |             | 22<br>.3 | Reference                |             | 7<br>6 | Reference             |              | 47<br>.9 | Reference                |              | 49<br>.6 | Reference            |              | 43<br>.5 | Reference                |             |
| Purchased                                 | 24<br>% | 13356                 | 0.00<br>2** | 94.<br>74 | 12.11<br>(2.89-<br>108.61) | 0.00<br>0** | 57<br>.9 | 4.73<br>(2.06-<br>11.16) | 0.00<br>0** | 9<br>5 | 6.94 (1.64-<br>63.08) | 0.00<br>3 ** | 65<br>.8 | 2.08<br>(0.92-<br>4.87)  | 0.06<br>4    | 73<br>.7 | 2.83 (1.21-<br>7.12) | 0.00<br>9 ** | 84<br>.2 | 7.48<br>(2.81-<br>23.55) | 0.00<br>0** |
| NUMBER OF BEDDING USAGE                   |         |                       |             |           |                            |             |          |                          |             |        |                       |              |          |                          |              |          |                      |              |          |                          |             |
| Two or three<br>uses                      | 33<br>% | 7642.<br>6            |             | 66.<br>04 | Reference                  |             | 41<br>.5 | Reference                |             | 7<br>7 | Reference             |              | 47<br>.2 | Reference                |              | 56<br>.6 | Reference            |              | 62<br>.3 | Reference                |             |
| One use                                   | 52<br>% | 6231.<br>1            | 0.46        | 76.<br>32 | 1.24 (0.55-<br>2.77)       | 0.57        | 25<br>.6 | 0.49<br>(0.22-<br>1.09)  | 0.06        | 8<br>7 | 1.21 (0.47-<br>3.03)  | 0.67         | 53<br>.7 | 1.29<br>(0.62-<br>2.75)  | 0.49         | 54<br>.9 | 0.93 (0.44-<br>1.98) | 0.86<br>1    | 51<br>.3 | 0.55<br>(0.25-<br>1.18)  | 0.11<br>3   |
| More than 4<br>uses                       | 15<br>% | 7883.<br>3            |             | 62.<br>5  | 0.86 (0.28-<br>2.69)       | 0.8         | 25       | 0.47<br>(0.13-<br>1.51)  | 0.21        | 6<br>7 | 1.70 (0.50-<br>5.56)  | 0.4          | 58<br>.3 | 1.56<br>(0.53-<br>4.70)  | 0.46         | 54<br>.2 | 0.91 (0.31-<br>2.69) | 1            | 41<br>.7 | 0.44<br>(0.14-<br>1.29)  | 0.13<br>7   |
| BEDDING DEPTH                             |         |                       |             |           |                            |             |          |                          |             |        |                       |              |          |                          |              |          |                      |              |          |                          |             |
| From 10 to<br>15cm                        | 9<br>%  | 1465.<br>3            |             | 60        | Reference                  |             | 33<br>.3 | Reference                |             | 7<br>3 | Reference             |              | 26<br>.7 | Reference                |              | 66<br>.7 | Reference            |              | 46<br>.7 | Reference                |             |
| Less than<br>10cm                         | 40<br>% | 7230.<br>9            | 0.35        | 68.<br>75 | 1.46 (0.37-<br>5.35)       | 0.55        | 32<br>.8 | 0.98<br>(0.26-<br>4.12)  | 1           | 8<br>1 | 1.57 (0.31-<br>6.58)  | 0.49         | 62<br>.5 | 4.93<br>(1.17-<br>21.56) | 0.01<br>9 *  | 60<br>.9 | 0.78 (0.19-<br>2.88) | 0.77<br>4    | 59<br>.4 | 1.66<br>(0.46-<br>6.11)  | 0.39<br>9   |
| More than<br>15cm                         | 50<br>% | 7755.<br>6            |             | 74.<br>32 | 1.46 (0.38-<br>5.19)       | 0.56        | 28<br>.8 | 0.81<br>(0.22-<br>3.36)  | 0.76        | 8<br>1 | 1.09 80.23-<br>4.24)  | 1            | 48<br>.8 | 2.59<br>(0.69-<br>12.11) | 0.16         | 48<br>.8 | 0.48 (0.12-<br>1.71) | 0.26<br>4    | 50       | 0.98<br>(0.28-<br>3.52)  | 1           |
| BEDDING COMPOSTING METHOD                 |         |                       |             |           |                            |             |          |                          |             |        |                       |              |          |                          |              |          |                      |              |          |                          |             |
| Fermentation                              | 53<br>% | 8010.<br>2            | 0.19        | 70.<br>51 | Reference                  |             | 32<br>.1 | Reference                |             | 7<br>9 | Reference             |              | 48<br>.8 | Reference                |              | 56       | Reference            |              | 56<br>.4 | Reference                |             |
| None                                      | 47<br>% | 5764.<br>7            |             | 70.<br>67 | 1.27 (0.62-<br>2.63)       | 0.5         | 29<br>.3 | 0.88<br>(0.42-<br>1.82)  | 0.73        | 8<br>1 | 1.54 (0.68-<br>3.58)  | 0.34         | 56       | 1.33<br>(0.68-<br>2.62)  | 0.43         | 54<br>.7 | 0.95 (0.48-<br>1.86) | 0.87<br>5    | 50<br>.7 | 0.93<br>(0.48-<br>1.82)  | 0.82<br>4   |
| PRESENCE OF <i>Alphitubius diaperinus</i> |         |                       |             |           |                            |             |          |                          |             |        |                       |              |          |                          |              |          |                      |              |          |                          |             |
| No                                        | 40<br>% | 8734.<br>2            | 0.05<br>8.  | 58.<br>73 | Reference                  |             | 27       | Reference                |             | 6<br>8 | Reference             |              | 47<br>.6 | Reference                |              | 46       | Reference            |              | 41<br>.3 | Reference                |             |
| Yes                                       | 60<br>% | 4233.<br>7            |             | 78.<br>89 | 1.99 (0.96-<br>4.15)       | 0.06        | 33<br>.3 | 1.35<br>(0.64-<br>2.92)  | 0.48        | 8<br>9 | 2.31 (1.02-<br>5.32)  | 0.03<br>3 *  | 55<br>.2 | 1.35<br>(0.68-<br>2.69)  | 0.42         | 61<br>.5 | 1.86 (0.93-<br>3.74) | 0.07<br>3    | 62<br>.2 | 1.98<br>(1.00-<br>4.00)  | 0.05<br>1*  |
| WATER MEDICATED WITH ANTICOCCIDIALS       |         |                       |             |           |                            |             |          |                          |             |        |                       |              |          |                          |              |          |                      |              |          |                          |             |
| No                                        | 89<br>% | 6248                  | 0.06        | 67.<br>88 | Reference                  |             | 27       | Reference                |             | 7<br>8 | Reference             |              | 50<br>.4 | Reference                |              | 54<br>.6 | Reference            |              | 49<br>.6 | Reference                |             |
| Yes                                       | 11<br>% | 12450                 |             | 93.<br>75 | 2.57 (0.68-<br>14.51)      | 0.18        | 61<br>.1 | 4.21<br>(1.38-<br>13.83) | 0.00<br>6** | 1<br>0 | 2.53 (0.55-<br>23.80) | 0.37         | 66<br>.7 | 1.96<br>(0.64-<br>6.75)  | 0.22         | 61<br>.1 | 1.30 (0.43-<br>4.21) | 0.80<br>2    | 87<br>.5 | 3.73<br>(1.10-<br>16.32) | 0.02<br>3*  |
| AGE                                       |         |                       |             |           |                            |             |          |                          |             |        |                       |              |          |                          |              |          |                      |              |          |                          |             |
| More than 46<br>days                      | 33<br>% | 3021 <sup>b</sup>     | 0.00<br>6** | 56        | Reference                  |             | 26<br>.9 | Reference                |             | 7<br>0 | Reference             |              | 36<br>.5 | Reference                |              | 40<br>.4 | Reference            |              | 44       | Reference                |             |
| Less than 35<br>days                      | 34<br>% | 12388<br><sup>a</sup> |             | 92.<br>31 | 6.73 (2.32-<br>22.64)      | 0.00<br>1** | 31<br>.5 | 1.24<br>(0.50-<br>3.16)  | 0.67        | 9<br>4 | 4.69 (1.48-<br>17.84) | 0.00<br>4 ** | 57<br>.4 | 2.32<br>(1.00-<br>5.51)  | 0.01<br>1 ** | 72<br>.2 | 3.79 (1.58-<br>9.41) | 0.00<br>2 ** | 55<br>.8 | 1.57<br>(0.69-<br>3.66)  | 0.52<br>5   |
| Between 36<br>and 45 days                 | 33<br>% | 5266 <sup>b</sup>     |             | 62.<br>75 | 1.30 (0.56-<br>3.04)       | 0.56        | 34       | 1.39<br>(0.56-<br>3.52)  | 0.53        | 7<br>6 | 1.35 (0.54-<br>3.44)  | 0.53         | 62<br>.3 | 2.84<br>(1.21-<br>6.83)  | 0.03<br>5 *  | 52<br>.8 | 1.65 (0.71-<br>3.85) | 0.24<br>2    | 60<br>.8 | 1.91<br>(0.83-<br>4.49)  | 0.12        |
| FEEDING TYPE                              |         |                       |             |           |                            |             |          |                          |             |        |                       |              |          |                          |              |          |                      |              |          |                          |             |
| Free (Ad<br>libitum)                      | 36<br>% | 9226.<br>3            | 0.26        | 10<br>6.9 | Reference                  |             | 25<br>.9 | Reference                |             | 8<br>1 | Reference             |              | 55<br>.2 | Reference                |              | 65<br>.5 | Reference            |              | 43<br>.1 | Reference                |             |

|                              |         |            |            |           |                      |             |          |                          |             |        |                        |             |          |                         |             |          |                         |              |          |                         |             |
|------------------------------|---------|------------|------------|-----------|----------------------|-------------|----------|--------------------------|-------------|--------|------------------------|-------------|----------|-------------------------|-------------|----------|-------------------------|--------------|----------|-------------------------|-------------|
| Controlled                   | 64<br>% | 5644.<br>4 |            | 48.<br>42 | 0.42 (0.18-<br>0.93) | 0.02<br>2*  | 33<br>.7 | 1.45<br>(0.67-<br>3.23)  | 0.37        | 8<br>0 | 0.71 (0.29-<br>1.67)   | 0.44        | 50<br>.5 | 0.83<br>(0.41-<br>1.66) | 0.62        | 49<br>.5 | 0.52 (0.25-<br>1.06)    | 0.06<br>8    | 60       | 1.70<br>(0.85-<br>3.46) | 0.13<br>8   |
| <b>RESTOCKING TIME</b>       |         |            |            |           |                      |             |          |                          |             |        |                        |             |          |                         |             |          |                         |              |          |                         |             |
| More than 68 days            | 23<br>% | 7170.<br>1 | 0.25       | 86.<br>67 | Reference            |             | 30<br>.6 | Reference                |             | 9<br>7 | Reference              |             | 58<br>.3 | Reference               |             | 61<br>.1 | Reference               |              | 63<br>.3 | Reference               |             |
| Less than 60 days            | 40<br>% | 10175      |            | 58.<br>33 | 0.54 (0.20-<br>1.42) | 0.2         | 35       | 1.22<br>(0.47-<br>3.32)  | 0.82        | 7<br>2 | 0.61 (0.19-<br>1.80)   | 0.47        | 43<br>.3 | 0.55<br>(0.22-<br>1.36) | 0.2         | 41<br>.7 | 0.46 (0.18-<br>1.14)    | 0.09<br>1    | 55       | 1.09<br>(0.44-<br>2.71) | 0.62<br>9   |
| Between 61 to 67 days        | 38<br>% | 3434.<br>3 |            | 74.<br>6  | 1.13 (0.40-<br>3.11) | 0.81        | 27       | 0.84<br>(0.31-<br>2.32)  | 0.82        | 8<br>1 | 1.03 (0.31-<br>3.21)   | 1           | 57<br>.1 | 0.95<br>(0.38-<br>2.36) | 1           | 65<br>.1 | 1.18 (0.46-<br>2.99)    | 0.82<br>8    | 47<br>.6 | 0.82<br>(0.33-<br>2.00) | 0.83<br>6   |
| <b>SANITARY EMPTY PERIOD</b> |         |            |            |           |                      |             |          |                          |             |        |                        |             |          |                         |             |          |                         |              |          |                         |             |
| More than 18 days            | 17<br>% | 9256.<br>7 | 0.18       | 88.<br>89 | Reference            |             | 48<br>.2 | Reference                |             | 8<br>9 | Reference              |             | 63       | Reference               |             | 66<br>.7 | Reference               |              | 66<br>.7 | Reference               |             |
| 8 to 15 days                 | 50<br>% | 6064.<br>6 |            | 59.<br>49 | 0.19 (0.03-<br>0.69) | 0.00<br>5** | 32<br>.9 | 0.53<br>(0.20-<br>1.42)  | 0.17        | 7<br>2 | 0.36 (0.06-<br>1.25)   | 0.11        | 46<br>.8 | 0.52<br>(0.19-<br>1.38) | 0.18        | 51<br>.9 | 0.54 (0.19-<br>1.46)    | 0.26<br>2    | 54<br>.4 | 0.60<br>(0.21-<br>1.61) | 0.36<br>7   |
| 3 to 7 days                  | 33<br>% | 7097.<br>6 |            | 78.<br>72 | 0.29 (0.05-<br>1.19) | 0.09        | 18<br>.9 | 0.26<br>(0.08-<br>0.78)  | 0.00<br>9** | 8<br>9 | 0.48 (0.08-<br>2.07)   | 0.36        | 54<br>.7 | 0.71<br>(0.24-<br>2.02) | 0.63        | 54<br>.7 | 0.61 (0.20-<br>1.74)    | 0.34<br>5    | 44<br>.7 | 0.33<br>(0.11-<br>0.95) | 0.03<br>3 * |
| <b>QUICKLIME</b>             |         |            |            |           |                      |             |          |                          |             |        |                        |             |          |                         |             |          |                         |              |          |                         |             |
| No                           | 27<br>% | 5307       | 0.2        | 48.<br>84 | Reference            |             | 37<br>.2 | Reference                |             | 6<br>5 | Reference              |             | 46<br>.5 | Reference               |             | 51<br>.2 | Reference               |              | 58<br>.1 | Reference               |             |
| Yes                          | 73<br>% | 7560.<br>4 |            | 79.<br>09 | 3.12 (1.41-<br>6.94) | 0.00<br>2** | 28<br>.5 | 0.67<br>(0.30-<br>1.52 ) | 0.34        | 8<br>6 | 2.41 (1.01-<br>5.67)   | 0.03<br>3 * | 54<br>.3 | 1.36<br>(0.64-<br>2.94) | 0.48        | 56<br>.9 | 1.26 (0.59-<br>2.70)    | 0.59<br>1    | 51<br>.8 | 0.70<br>(0.32-<br>1.49) | 0.37<br>3   |
| <b>PHENOLICS</b>             |         |            |            |           |                      |             |          |                          |             |        |                        |             |          |                         |             |          |                         |              |          |                         |             |
| No                           | 60<br>% | 5024.<br>3 | 0.22       | 65.<br>17 | Reference            |             | 36<br>.8 | Reference                |             | 8<br>0 | Reference              |             | 48<br>.4 | Reference               |             | 48<br>.4 | Reference               |              | 65<br>.2 | Reference               |             |
| Yes                          | 20<br>% | 9581.<br>3 |            | 78.<br>13 | 2.26 (0.84-<br>6.84) | 0.09        | 34<br>.4 | 0.90<br>(0.35-<br>2.23)  | 0.84        | 8<br>4 | 1.82 (0.60-<br>6.72)   | 0.33        | 53<br>.1 | 1.21<br>(0.50-<br>2.92) | 0.69        | 65<br>.6 | 2.02 (0.82-<br>5.19)    | 0.10<br>5    | 50       | 0.64<br>(0.26-<br>1.55) | 0.30<br>5   |
| <b>FORMALDEHYDE</b>          |         |            |            |           |                      |             |          |                          |             |        |                        |             |          |                         |             |          |                         |              |          |                         |             |
| No                           | 55<br>% | 6751.<br>4 | 0.44       | 70.<br>37 | Reference            |             | 36<br>.8 | Reference                |             | 8<br>4 | Reference              |             | 48<br>.3 | Reference               |             | 52<br>.9 | Reference               |              | 61<br>.7 | Reference               |             |
| Yes                          | 25<br>% | 4913.<br>3 |            | 65        | 0.98 (0.42-<br>2.34) | 1           | 35       | 0.93<br>(0.39-<br>2.16)  | 1           | 7<br>5 | 0.84 (0.32-<br>2.28)   | 0.82        | 52<br>.5 | 1.18<br>(0.52-<br>2.69) | 0.71        | 52<br>.5 | 0.99 (0.44-<br>2.24)    | 1            | 60       | 1.11<br>(0.49-<br>2.57) | 0.84<br>8   |
| <b>FLAMED</b>                |         |            |            |           |                      |             |          |                          |             |        |                        |             |          |                         |             |          |                         |              |          |                         |             |
| No                           | 59<br>% | 4035       | 0.01<br>1* | 61.<br>36 | Reference            |             | 31<br>.9 | Reference                |             | 7<br>8 | Reference              |             | 44<br>.7 | Reference               |             | 45<br>.7 | Reference               |              | 54<br>.6 | Reference               |             |
| Yes                          | 41<br>% | 11164      |            | 83.<br>08 | 3.61 (1.61-<br>8.65) | 0.00<br>1** | 29<br>.2 | 0.88<br>(0.41-<br>1.85)  | 0.86        | 8<br>3 | 1.77 (0.76-<br>4.36)   | 0.18        | 63<br>.1 | 2.11<br>(1.06-<br>4.26) | 0.02<br>5 * | 69<br>.2 | 2.65 (1.31-<br>5.51)    | 0.00<br>4 ** | 52<br>.3 | 1.05<br>(0.53-<br>2.08) | 1           |
| <b>QUATERNARY AMMONIUM</b>   |         |            |            |           |                      |             |          |                          |             |        |                        |             |          |                         |             |          |                         |              |          |                         |             |
| No                           | 89<br>% | 6961.<br>7 | 0.78       | 71.<br>85 | Reference            |             | 34<br>.8 | Reference                |             | 8<br>2 | Reference              |             | 53<br>.2 | Reference               |             | 55<br>.3 | Reference               |              | 51<br>.9 | Reference               |             |
| Yes                          | 11<br>% | 6866       |            | 61.<br>11 | 0.71 (0.23-<br>2.33) | 0.59        | 50       | 2.51<br>(0.82-<br>7.72)  | 0.1         | 6<br>7 | 0.54 (0.17-<br>1.91)   | 0.25        | 44<br>.4 | 0.71<br>(0.23-<br>2.12) | 0.62        | 55<br>.6 | 1.01 (0.34-<br>3.13)    | 1            | 66<br>.7 | 2.02<br>(0.66-<br>6.94) | 0.21<br>5   |
| <b>OTHER DISINFECTANTS</b>   |         |            |            |           |                      |             |          |                          |             |        |                        |             |          |                         |             |          |                         |              |          |                         |             |
| No                           | 94<br>% | 4008.<br>3 | 0.19       | 70.<br>83 | Reference            |             | 32       | Reference                |             | 8<br>0 | Reference              |             | 52<br>.7 | Reference               |             | 52<br>.7 | Reference               |              | 54<br>.9 | Reference               |             |
| Yes                          | 6<br>%  | 7127.<br>3 |            | 66.<br>67 | 0.94 (0.19-<br>6.06) | 1           | 11<br>.1 | 0.27<br>(0.01-<br>2.09)  | 0.28        | 8<br>9 | 2.42 (0.31-<br>111.03) | 0.69        | 44<br>.4 | 0.72<br>(0.14-<br>3.49) | 0.74        | 44<br>.4 | 0.72<br>80.14-<br>3.49) | 0.73<br>8    | 33<br>.3 | 0.45<br>(0.07-<br>2.21) | 0.31<br>7   |

\*\* Differences in farm characteristics and/or control measures with  $p \leq 0.01$

\* Differences in farm characteristics and/or control measures with  $p \leq 0.05$

CI: Confidence Interval. Different letters indicate significant differences.
